# Supplementary material
Source: publisher site journal article supplement (https://www.dovepress.com/get_supplementary_file.php?f=480328.docx)
Supplement: Supplementary file 1 [file get_supplementary_file.php]

Supplementary Table 1. Design matrix of 16 hypothetical scenarios

| Scenario | Stability | Attachment | Autonomy | Achievement | Enjoyment |
| --- | --- | --- | --- | --- | --- |
| 1 | 2 | 1 | 1 | 2 | 3 |
| 2 | 1 | 1 | 4 | 3 | 4 |
| 3 | 4 | 3 | 4 | 2 | 2 |
| 4 | 1 | 4 | 1 | 4 | 2 |
| 5 | 1 | 3 | 3 | 1 | 3 |
| 6 | 4 | 1 | 3 | 4 | 1 |
| 7 | 2 | 4 | 4 | 1 | 1 |
| 8 | 3 | 1 | 2 | 1 | 2 |
| 9 | 1 | 2 | 2 | 2 | 1 |
| 10 | 2 | 3 | 2 | 4 | 4 |
| 11 | 3 | 4 | 3 | 2 | 4 |
| 12 | 3 | 3 | 1 | 3 | 1 |
| 13 | 2 | 2 | 3 | 3 | 2 |
| 14 | 4 | 4 | 2 | 3 | 3 |
| 15 | 3 | 2 | 4 | 4 | 3 |
| 16 | 4 | 2 | 1 | 1 | 4 |
|  |  |  |  |  |  |
| ***Data from HEALTH ECONOMICS Health Econ. 24: 258–269 (2015) Published online 20 November 2013 in Wiley Online Library (wileyonlinelibrary.com). DOI: 10.1002/hec.3014 (11)*** | | | | | |

Supplementary Table. 2  Additional details of the participants’ characteristics

|  |  | n=400 |
| --- | --- | --- |
| Characteristic | | **n (%)** |
| Past history | |  |
|  | Stroke |  |
|  | No | 389 (97%) |
|  | Yes | 11 (2.8%) |
|  | Heart diseases |  |
|  | No | 382 (96%) |
|  | Yes | 18 (4.5%) |
|  | Lung diseases |  |
|  | No | 391 (98%) |
|  | Yes | 9 (2.2%) |
|  | Cancer |  |
|  | No | 374 (94%) |
|  | Yes | 26 (6.5%) |
|  | Diabetes |  |
|  | No | 377 (94%) |
|  | Yes | 23 (5.8%) |
|  | Hypertension |  |
|  | No | 332 (83%) |
|  | Yes | 68 (17%) |
|  | Hyperlipidaemia |  |
|  | No | 354 (88%) |
|  | Yes | 46 (12%) |
|  | Orthopaedic disease |  |
|  | No | 322 (80%) |
|  | Yes | 78 (20%) |
|  | Others |  |
|  | No | 267 (67%) |
|  | Yes | 133 (33%) |
| Present history | |  |
|  | Stroke |  |
|  | No | 393 (98%) |
|  | Yes | 7 (1.8%) |
|  | Heart diseases |  |
|  | No | 387 (97%) |
|  | Yes | 13 (3.2%) |
|  | Lung diseases |  |
|  | No | 395 (99%) |
|  | Yes | 5 (1.3%) |
|  | Cancer |  |
|  | No | 387 (97%) |
|  | Yes | 13 (3.2%) |
|  | Diabetes |  |
|  | No | 379 (95%) |
|  | Yes | 21 (5.2%) |
|  | Hypertension |  |
|  | No | 339 (85%) |
|  | Yes | 61 (15%) |
|  | Hyperlipidaemia |  |
|  | No | 360 (90%) |
|  | Yes | 40 (10%) |
|  | Orthopaedic disease |  |
|  | No | 370 (92%) |
|  | Yes | 30 (7.5%) |
|  | Others |  |
|  | No | 310 (78%) |
|  | Yes | 90 (22%) |
|  |  | |

Supplemental table 3. Comparison of the implied tariffs and the utility increase from the lower level between Japan and the UK

|  |  |  |  |  |  |
| --- | --- | --- | --- | --- | --- |
|  | Japan tariff | UK tariff |  | Capabilities increase from lower level | |
|  |  | Japan | UK |
| Stability (4) | 0.1966 | 0.2221 |  | 0.0159 | 0.0306 |
| Stability (3) | 0.1807 | 0.1915 |  | 0.0555 | 0.0902 |
| Stability (2) | 0.1252 | 0.1013 |  | 0.1237 | 0.1021 |
| Stability (1) | 0.0015 | -0.0008 |  |  |  |
| Attachment (4) | 0.2110 | 0.2276 |  | 0.0108 | 0.0386 |
| Attachment (3) | 0.2002 | 0.1890 |  | 0.0976 | 0.0926 |
| Attachment (2) | 0.1027 | 0.0964 |  | 0.1128 | 0.1203 |
| Attachment (1) | -0.0101 | -0.0239 |  |  |  |
| Autonomy (4) | 0.1925 | 0.1881 |  | 0.0110 | 0.0321 |
| Autonomy (3) | 0.1815 | 0.1560 |  | 0.0650 | 0.0724 |
| Autonomy (2) | 0.1165 | 0.0836 |  | 0.1033 | 0.0773 |
| Autonomy (1) | 0.0133 | 0.0063 |  |  |  |
| Achievement (4) | 0.1775 | 0.1811 |  | 0.0064 | 0.0223 |
| Achievement (3) | 0.1712 | 0.1588 |  | 0.0374 | 0.0679 |
| Achievement (2) | 0.1338 | 0.0909 |  | 0.1124 | 0.0699 |
| Achievement (1) | 0.0214 | 0.0210 |  |  |  |
| Enjoyment (4) | 0.2223 | 0.1811 |  | 0.0135 | 0.0271 |
| Enjoyment (3) | 0.2088 | 0.1540 |  | 0.1100 | 0.0847 |
| Enjoyment (2) | 0.0988 | 0.0693 |  | 0.1248 | 0.0719 |
| Enjoyment (1) | -0.0260 | -0.0026 |  |  |  |
|  |  |  |  |  |  |

Supplementary Table 4. The results of the sensitivity analyses

|  | Primary model (Table 5) | Sensitivity analyses | | | |
| --- | --- | --- | --- | --- | --- |
|  | Model 1 | Model 2 | Model 3 | Model 4 |
| Stability (4) | 0.1966 | 0.1963 | 0.1976 | 0.1949 | 0.1965 |
| Stability (3) | 0.1807 | 0.1834 | 0.1804 | 0.1779 | 0.1828 |
| Stability (2) | 0.1252 | 0.1418 | 0.1216 | 0.1220 | 0.1280 |
| Stability (1) | 0.0015 | 0.0035 | 0.0013 | 0.0032 | 0.0014 |
| Attachment (4) | 0.2110 | 0.2069 | 0.2115 | 0.2107 | 0.2129 |
| Attachment (3) | 0.2002 | 0.1985 | 0.2002 | 0.1990 | 0.2018 |
| Attachment (2) | 0.1027 | 0.1265 | 0.1004 | 0.0976 | 0.1047 |
| Attachment (1) | -0.0101 | -0.0071 | -0.0112 | -0.0092 | -0.0108 |
| Autonomy (4) | 0.1925 | 0.1930 | 0.1923 | 0.1931 | 0.1901 |
| Autonomy (3) | 0.1815 | 0.1835 | 0.1819 | 0.1814 | 0.1845 |
| Autonomy (2) | 0.1165 | 0.1379 | 0.1136 | 0.1117 | 0.1191 |
| Autonomy (1) | 0.0133 | 0.0105 | 0.0131 | 0.0119 | 0.0150 |
| Achievement (4) | 0.1775 | 0.1863 | 0.1775 | 0.1795 | 0.1769 |
| Achievement (3) | 0.1712 | 0.1788 | 0.1709 | 0.1696 | 0.1716 |
| Achievement (2) | 0.1338 | 0.1466 | 0.1318 | 0.1302 | 0.1386 |
| Achievement (1) | 0.0214 | 0.0132 | 0.0207 | 0.0188 | 0.0215 |
| Enjoyment (4) | 0.2223 | 0.2175 | 0.2211 | 0.2218 | 0.2236 |
| Enjoyment (3) | 0.2088 | 0.2086 | 0.2073 | 0.2079 | 0.2103 |
| Enjoyment (2) | 0.0988 | 0.1188 | 0.0965 | 0.0932 | 0.1020 |
| Enjoyment (1) | -0.0260 | -0.0200 | -0.0239 | -0.0248 | -0.0272 |
| * Model 1: Scale adjusted multinominal logit model (adjusted by ESP). Model 2: Mixed-mixed logit model without class share terms. Model 3: Latent class logit model. Model 4: Multinomial logit model. | | | | | |
